# Supplementary material for: Olive Pomace Phenolic Compounds Stability and Safety Evaluation: From Raw Material to Future Ophthalmic Applications
Source: MDPI journal article supplement (doi:10.3390/molecules26196002), 2021-10-02
Supplement: s1 [file s1]

# Olive pomace phenolic compounds stability and safety evaluation: from raw material to future ophthalmic applications

Nikolaos Katsinas <sup>1,2,3</sup>, Amalia Enríquez-de-Salamanca <sup>2,3</sup>, Andreia Bento da Silva <sup>4,5,6</sup>, Maria Rosário Bronze <sup>4,7,8</sup> and Soraya Rodríguez-Rojo <sup>1,\*</sup>

<sup>1</sup> Research Institute on Bioeconomy (BioEcoUVa), High Pressure Processes Group, School of Engineering, University of Valladolid (UVa), Dr. Mergelina str., 47011, Valladolid, Spain; nkatsinas@ioba.med.uva.es

<sup>2</sup> Institute of Applied Ophthalmobiology (IOBA), Campus Miguel Delibes, University of Valladolid (UVa), Paseo de Belén 17, 47011 Valladolid, Spain; amalia@ioba.med.uva.es

<sup>3</sup> Biomedical Research Networking Center in Bioengineering, Biomaterials and Nanomedicine (CIBER-BBN), Av. Monforte de Lemos, 3-5, 28029 Madrid, Spain

<sup>4</sup> Instituto de Investigação do Medicamento (iMed.Ulisboa), Faculdade de Farmácia, Universidade de Lisboa (FFULisboa), Av. Prof. Gama Pinto, 1649-019, Lisbon, Portugal; mrbronze@ff.ulisboa.pt; abentosilva@ff.ulisboa.pt

<sup>5</sup> Departamento de Ciências Farmacêuticas e do Medicamento (DCFM), Faculdade de Farmácia da Universidade de Lisboa (FFUL), Av. das Forças Armadas, 1649-003 Lisboa, Portugal

<sup>6</sup> Faculdade de Ciências e Tecnologia da Universidade Nova de Lisboa (FCT NOVA), Largo da Torre, 2829-516, Caparica, Portugal

<sup>7</sup> Instituto de Biologia Experimental e Tecnológica (iBET), Apartado 12, 2780-901, Oeiras, Portugal

<sup>8</sup> Instituto de Tecnologia Química e Biológica da Universidade Nova de Lisboa (ITQB NOVA), Av. da República, 2780-157, Oeiras, Portugal

\* Correspondence: soraya.rodriguez@uva.es; Tel.: +34-983-184-077

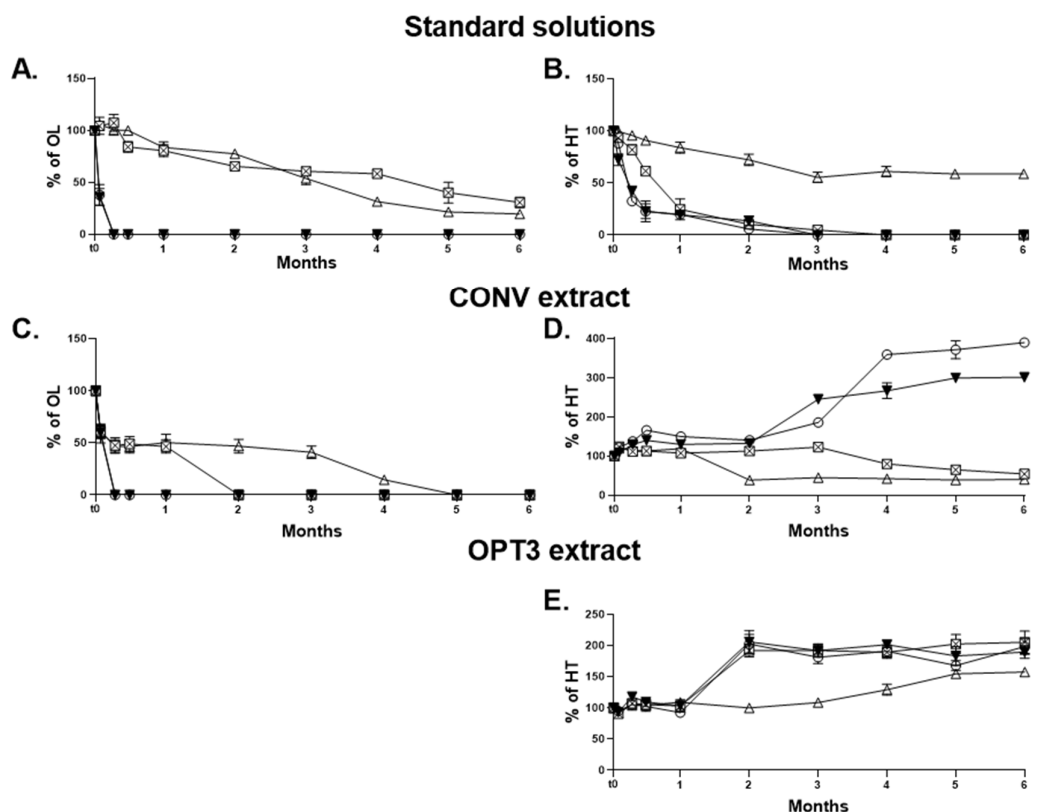

⊕ T=40 ± 2 °C, 75 ± 5% RH ⊖ T=30 ± 2 °C, 65 ± 5% RH ⊗ T=25 ± 2 °C, 60 ± 5% RH △ T=5 ± 3 °C, no humidity

**Figure S1.** Stability studies from 1 to 6 months of aqueous solution of oleuropein (OL) standard (A), hydroxytyrosol (HT) standard (B), OL (C) and HT (D) in conventional (CONV) extract, and HT (E) in optimized (OPT3) extract at 4 different conditions of temperature (T) and relative humidity (RH). Results are presented as average of percentage of each compound (HT or OL) with respect to the initial quantity of  $\pm$  standard deviation (SD). Lines added to guide the eye.

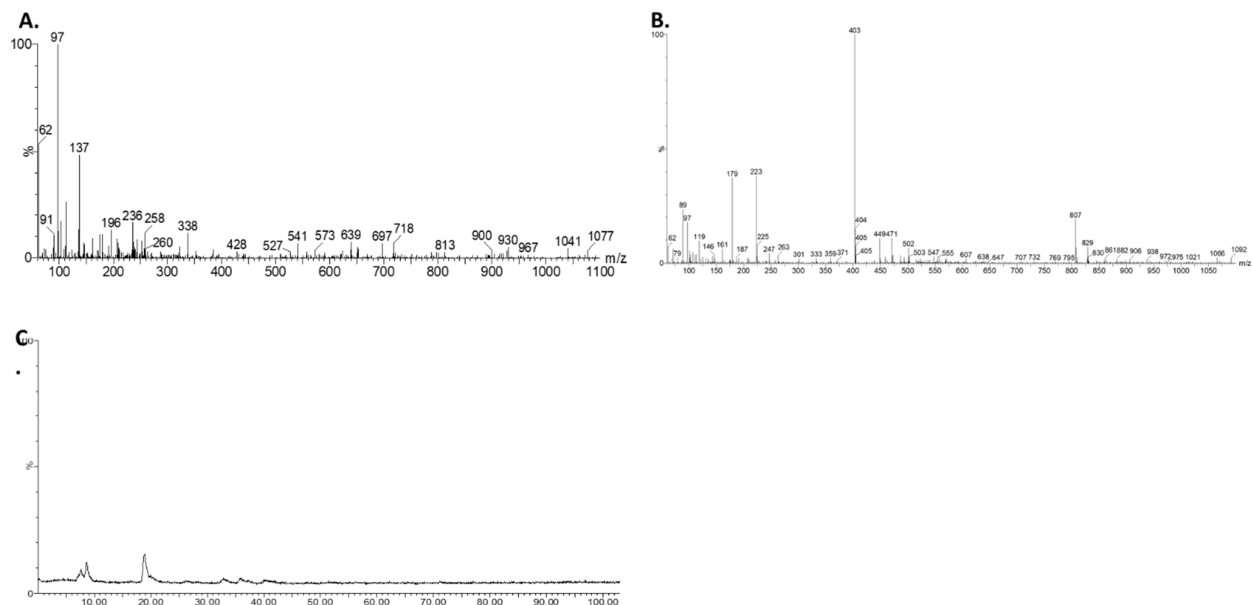

**Figure S2.** Full scan mass spectra acquired in electrospray ionization source in negative mode (ESI-) from peaks at 15.91 min (A) and 18.83 min (B) detected in the analysis of the oleuropein (OL) aqueous standard solution after exposure for 2 days at  $40 \pm 2^\circ\text{C}$  and  $75 \pm 5\%$  relative humidity (RH). The scan chromatogram in is also presented (C).

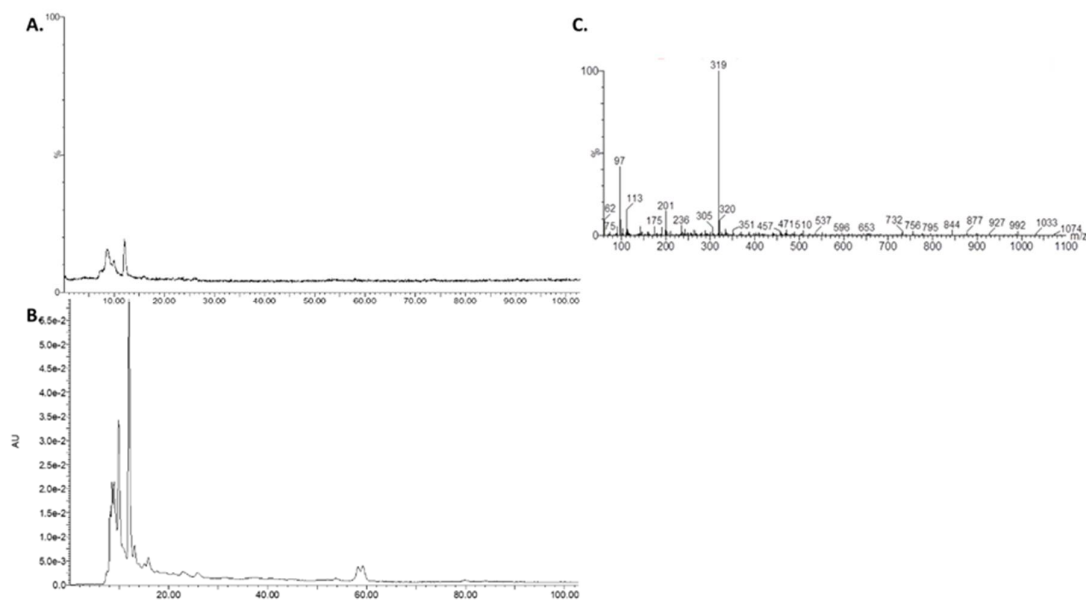

**Figure S3.** UV Chromatogram at 280nm (A), scan chromatogram in electrospray ionization source in negative mode (ESI-) (B) and full scan mass spectra from peak at 10.14 min (C) detected in the analysis of the hydroxytyrosol (HT) aqueous standard solution after 30 days exposure at  $40 \pm 2^\circ\text{C}$  and  $75 \pm 5\%$  relative humidity (RH).

**Table S1.** Analysis of variances (ANOVA) of all responses measured for extracts generated by conventional extraction conditions, using olive pomace (OP) stored at different conditions. Significance ( $p$ -value<0.05) is presented in bold.

| Comparison                | <i>p</i> -values |        |                   |                   |               |               |                   |               |
|---------------------------|------------------|--------|-------------------|-------------------|---------------|---------------|-------------------|---------------|
|                           | AA               | TPC    | TFC               | OL                | OLC           | HT            | TY                | EY            |
| Freeze-dried vs Fresh     | <b>0.0057</b>    | 0.6992 | <b>0.0042</b>     | <b>0.0175</b>     | <b>0.0015</b> | <b>0.0410</b> | 0.1597            | <b>0.0024</b> |
| Freeze-dried vs De-frozen | <b>0.0231</b>    | 0.9998 | 0.9622            | <b>&lt;0.0001</b> | <b>0.0052</b> | 0.3166        | <b>0.0302</b>     | 0.0623        |
| Freeze-dried vs Dried     | <b>0.0002</b>    | 0.2495 | <b>&lt;0.0001</b> | 0.5729            | <b>0.0006</b> | <b>0.0009</b> | <b>&lt;0.0001</b> | 0.1359        |
| De-frozen vs Fresh        | 0.7141           | 0.7422 | <b>0.0076</b>     | <b>0.0011</b>     | 0.7101        | 0.4874        | 0.6505            | 0.1359        |
| De-frozen vs Dried        | <b>0.0161</b>    | 0.2762 | <b>&lt;0.0001</b> | <b>&lt;0.0001</b> | 0.2582        | <b>0.0079</b> | <b>0.0014</b>     | 0.9429        |
| Dried vs Fresh            | 0.0712           | 0.7836 | <b>0.0062</b>     | <b>0.0033</b>     | 0.7870        | 0.0592        | <b>0.0004</b>     | 0.0623        |
| Freeze-dried vs Fresh     | <b>0.0057</b>    | 0.6992 | <b>0.0042</b>     | <b>0.0175</b>     | <b>0.0015</b> | <b>0.0410</b> | 0.1597            | <b>0.0024</b> |

\*Responses measured: Antioxidant activity (AA), total phenolic content (TPC), total flavonoid content (TFC), extract richness in oleuropein (OL), oleacein (OLC), hydroxytyrosol (HT) and tyrosol (TY), as well as extraction yield (EY)

**Table S2.** Analysis of variances (ANOVA) of the effect of 2 different defatting methods on the responses measured for extracts generated by conventional extraction conditions, using freeze-dried olive pomace (OP). An extract produced by non-defatted OP was used as the reference. Significance ( $p$ -value<0.05) is presented in bold.

| Comparison                            | <i>p</i> -values |               |         |        |        |         |        |        |
|---------------------------------------|------------------|---------------|---------|--------|--------|---------|--------|--------|
|                                       | AA               | TPC           | TFC     | OL     | OLC    | HT      | TY     | EY     |
| Reference vs <i>n</i> -hexane         | 0.2550           | 0.4175        | 0.4327  | 0.2604 | 0.9984 | >0.9999 | 0.7684 | 0.9968 |
| Reference vs scCO <sub>2</sub>        | 0.4896           | <b>0.0441</b> | >0.9999 | 0.9738 | 0.9935 | 0.8440  | 0.6892 | 0.1816 |
| <i>n</i> -hexane vs scCO <sub>2</sub> | 0.8428           | 0.2442        | 0.4327  | 0.3393 | 0.9854 | 0.8440  | 0.9891 | 0.1649 |

\*Responses measured: Antioxidant activity (AA), total phenolic content (TPC), total flavonoid content (TFC), extract richness in oleuropein (OL), oleacein (OLC), hydroxytyrosol (HT) and tyrosol (TY), as well as extraction yield (EY)

**Table S3.** Analysis of variances (ANOVA) of the effect of the extract drying on the stability of the responses measured compared to a freshly obtained liquid extract (reference). Significance ( $p$ -value<0.05) is presented in bold.

| Comparison          | <i>p</i> -values  |               |        |               |        |               |               |
|---------------------|-------------------|---------------|--------|---------------|--------|---------------|---------------|
|                     | AA                | TPC           | TFC    | OL            | OLC    | HT            | TY            |
| Reference vs Step 1 | 0.6205            | 0.9791        | 0.9929 | 0.9053        | 0.9665 | 0.3077        | 0.9982        |
| Reference vs Step 2 | <b>&lt;0.0001</b> | <b>0.0170</b> | 0.6559 | <b>0.0122</b> | 0.1711 | <b>0.0027</b> | <b>0.0094</b> |
| Step 1 vs Step 2    | <b>&lt;0.0001</b> | <b>0.0212</b> | 0.5920 | <b>0.0078</b> | 0.2342 | <b>0.0132</b> | <b>0.0089</b> |

\*Responses measured: Antioxidant activity (AA), total phenolic content (TPC), total flavonoid content (TFC), and extract richness in oleuropein (OL), oleacein (OLC), hydroxytyrosol (HT) and tyrosol (TY).

**Table S4.** Analysis of variances (ANOVA) of the genotoxic effect (alkaline comet assay) of olive pomace (OP) extracts (0.8 mg/mL conventional – CONV and 0.4 mg/mL optimized – OPT3), together with 300  $\mu$ M (162.2 mg/L) oleuropein (OL), 100  $\mu$ M (15.4 mg/L) hydroxytyrosol (HT) and their mixture (5  $\mu$ M/ 2.7 mg/L + 50  $\mu$ M/7.7 mg/L OL+HT) on human corneal (HCE) and conjunctival (IM-ConjEpi) epithelial cells treated for 24 hours. Treatments are compared to control cells (treated with cell culture medium) and  $p$ -values lower than 0.05 were considered statistically significant.

| Compared to control | <i>p</i> -values |            |
|---------------------|------------------|------------|
|                     | HCE              | IM-ConjEpi |
| OL                  | 0.984            | 0.095      |
| HT                  | 1.000            | 0.982      |
| OL+HT               | 0.450            | 0.603      |
| CONV                | 1.000            | 0.359      |
| OPT3                | 0.932            | 1.000      |
